# Supplementary material
Source: publisher figshare collection journal article supplement (https://acs.figshare.com/ndownloader/files/28566056)
Supplement: Supplementary file 1 [file 28566056]

## SUPPORTING INFORMATION

### **“Guanine Tautomerism in Ionic Complexes with Ag<sup>+</sup> Investigated by IRMPD Spectroscopy and Mass Spectrometry”**

A. F. Cruz-Ortiz,<sup>a,b,c</sup> F. L. Molina,<sup>a,b,c</sup> P. Maitre<sup>d</sup> and G. A. Pino<sup>a,b,c,\*</sup>

<sup>a</sup> INFIQC (CONICET-UNC), Ciudad Universitaria, Pabellón Argentina, 5000 Córdoba, Argentina.

<sup>b</sup> Departamento de Fisicoquímica, Fac. de Ciencias Químicas, Universidad Nacional de Córdoba, Ciudad Universitaria, Pabellón Argentina, X5000HUA Córdoba, Argentina.

<sup>c</sup> Centro Láser de Ciencias Moleculares, Universidad Nacional de Córdoba, Ciudad Universitaria, Pabellón Argentina, X5000HUA Córdoba, Argentina.

<sup>d</sup> Université Paris-Saclay, CNRS, Institut de Chimie Physique, 91405, Orsay, France.

\*Corresponding author: gpino@unc.edu.ar

**Table SI 1.** Relative energies including zero point energy corrections (EE+ZPE) and relative standard Gibbs energies calculated at 298K ( $\Delta G^\circ$ ) for the isomers of  $[\text{GKA}(1,7)\text{Ag}-\text{H}_2\text{O}]^+$  and  $[\text{GKA}(1,9)\text{Ag}-\text{H}_2\text{O}]^+$  complex and the correction of relative energies considering the effect of the solvent (PCM). Relative populations (R.P.) were calculated assuming a Boltzmann distribution at 298 K.

| Structure                                                                                                                                  | Gas phase  |                                |                     | PCM (water) |                                |                    |
|--------------------------------------------------------------------------------------------------------------------------------------------|------------|--------------------------------|---------------------|-------------|--------------------------------|--------------------|
|                                                                                                                                            | EE+ZPE     | $\Delta G^\circ_{298\text{K}}$ | R.P.                | EE+ZPE      | $\Delta G^\circ_{298\text{K}}$ | R.P.               |
|                                                                                                                                            | (kcal/mol) | (kcal/mol)                     |                     | (kcal/mol)  | (kcal/mol)                     |                    |
| 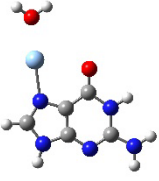<br>$[\text{GKA}(1,9)\text{N7Ag}-\text{H}_2\text{O}]^+$   | 0          | 0                              | 1                   | 0           | 0                              | 1                  |
| <br>$[\text{GKA}(1,7)\text{N9Ag}-\text{H}_2\text{O}]^+$  | 4.3        | 4.0                            | $1 \times 10^{-3}$  | 0.2         | 0.3                            | 0.6                |
| <br>$[\text{GKA}(1,7)\text{N3Ag}-\text{H}_2\text{O}]^+$ | 8.3        | 7.9                            | $2 \times 10^{-6}$  | 2.6         | 2.4                            | $2 \times 10^{-2}$ |
| <br>$[\text{GKA}(1,7)\text{OAg}-\text{H}_2\text{O}]^+$  | 19.9       | 18.9                           | $2 \times 10^{-14}$ | 9.5         | 8.6                            | $5 \times 10^{-7}$ |
| <br>$[\text{GKA}(1,9)\text{N3Ag}-\text{H}_2\text{O}]^+$ | 23.5       | 23.3                           | $8 \times 10^{-18}$ | 4.1         | 3.9                            | $1 \times 10^{-3}$ |

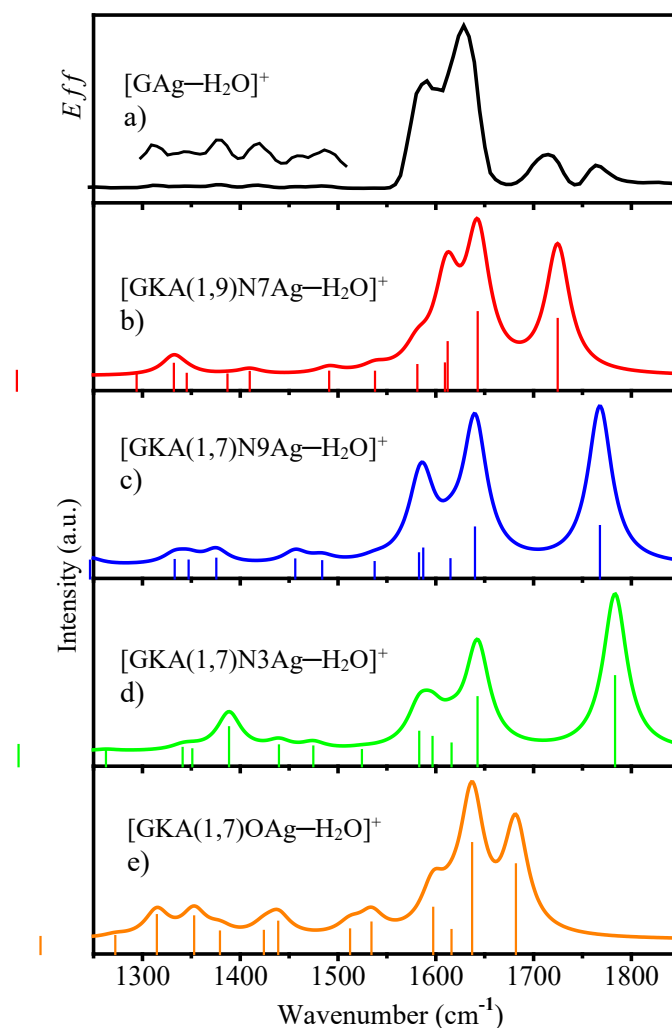

**Figure SI 1.** a) Experimental IRMPD spectrum of  $[\text{GAg-H}_2\text{O}]^+$  complex recorded in the spectral range 1250–1850  $\text{cm}^{-1}$  and calculated spectra of the four lowest energy isomers calculated at the B3LYP/6-311G++(d,p) and SDD level for  $\text{Ag}^+$ : b)  $[\text{GKA}(1,9)\text{N7Ag-H}_2\text{O}]^+$ , c)  $[\text{GKA}(1,7)\text{N9Ag-H}_2\text{O}]^+$ , d)  $[\text{GKA}(1,7)\text{N3Ag-H}_2\text{O}]^+$  and e)  $[\text{GKA}(1,7)\text{OAg-H}_2\text{O}]^+$ . The vibrational frequencies were corrected with a factor of 0.983.

**Table SI 2.** Relative energies including zero point energy corrections (EE+ZPE) and relative standard Gibbs energies calculated at 298K ( $\Delta G^\circ$ ) for the isomers of  $[\text{GEA}(9)\text{Ag}-\text{H}_2\text{O}]^+$  complex and the correction of relative energies considering the effect of the solvent (PCM). Relative populations (R.P.) were calculated assuming a Boltzmann distribution at 298 K.

| Structure                                                                                                                                              | Gas phase  |                                |                     | PCM (water) |                                |                    |
|--------------------------------------------------------------------------------------------------------------------------------------------------------|------------|--------------------------------|---------------------|-------------|--------------------------------|--------------------|
|                                                                                                                                                        | EE+ZPE     | $\Delta G^\circ_{298\text{K}}$ | R.P.                | EE+ZPE      | $\Delta G^\circ_{298\text{K}}$ | R.P.               |
|                                                                                                                                                        | (kcal/mol) | (kcal/mol)                     |                     | (kcal/mol)  | (kcal/mol)                     |                    |
| 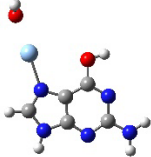<br>$[\text{GEA}(9)_{\text{anti}}\text{N7Ag}-\text{H}_2\text{O}]^+$   | 7.0        | 6.7                            | $1 \times 10^{-5}$  | 7.3         | 6.9                            | $9 \times 10^{-5}$ |
| <br>$[\text{GEA}(9)_{\text{syn}}\text{N1Ag}-\text{H}_2\text{O}]^+$   | 11.8       | 12.4                           | $8 \times 10^{-10}$ | 11.1        | 11.4                           | $4 \times 10^{-9}$ |
| <br>$[\text{GEA}(9)_{\text{syn}}\text{N7Ag}-\text{H}_2\text{O}]^+$  | 18.2       | 17.9                           | $8 \times 10^{-14}$ | 10.4        | 10.4                           | $2 \times 10^{-8}$ |
| <br>$[\text{GEA}(9)_{\text{anti}}\text{N3Ag}-\text{H}_2\text{O}]^+$ | 19.3       | 19.5                           | $5 \times 10^{-15}$ | 9.5         | 9.9                            | $6 \times 10^{-8}$ |

|                                                                                   |      |      |                     |      |      |                    |
|-----------------------------------------------------------------------------------|------|------|---------------------|------|------|--------------------|
| 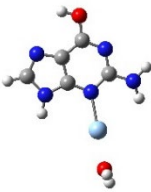 | 19.8 | 20.0 | $2 \times 10^{-15}$ | 10.5 | 9.6  | $9 \times 10^{-8}$ |
| $[\text{GEA}(9)_{\text{syn}}\text{N3Ag}-\text{H}_2\text{O}]^+$                    |      |      |                     |      |      |                    |
|  | 21.8 | 21.8 | $1 \times 10^{-16}$ | 12.8 | 13.2 | $2 \times 10^{-1}$ |
| $[\text{GEA}(9)_{\text{anti}}\text{N1Ag}-\text{H}_2\text{O}]^+$                   |      |      |                     |      |      |                    |
| //                                                                                |      |      |                     |      |      |                    |

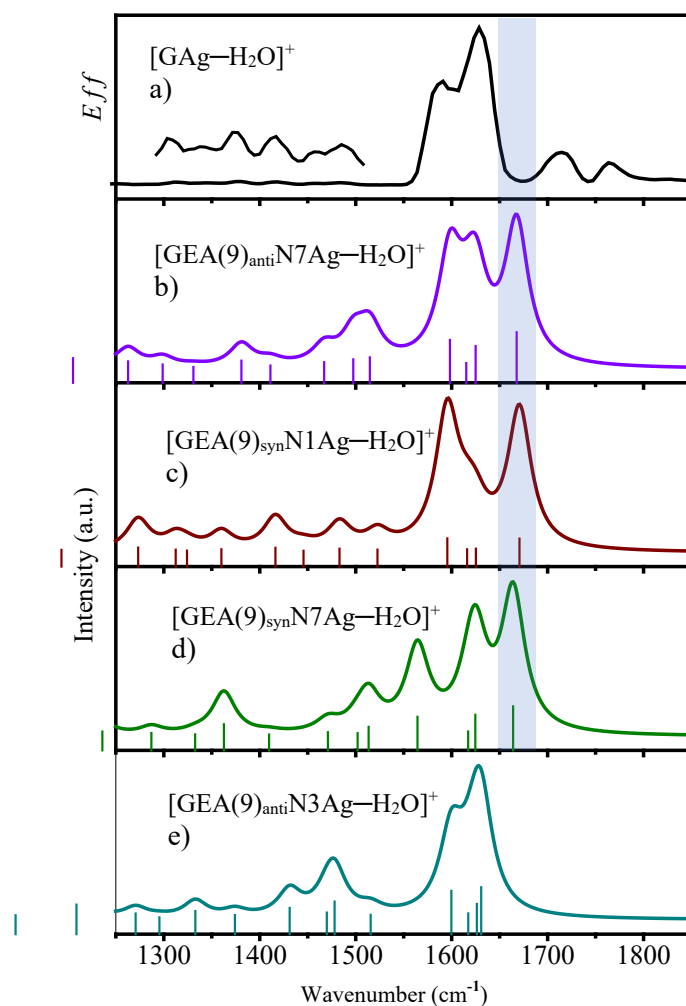

**Figure SI 2.** a) Experimental IRMPD spectrum of  $[\text{GAg}-\text{H}_2\text{O}]^+$  complex recorded in the spectral range 1250–1850  $\text{cm}^{-1}$  and calculated spectra of the four lowest energy isomers calculated at the B3LYP/6-311G++(d,p) and SDD level for  $\text{Ag}^+$ : b)  $[\text{GEA}(9)_{\text{anti}}\text{N7Ag}-\text{H}_2\text{O}]^+$ , c)  $[\text{GEA}(9)_{\text{syn}}\text{N1Ag}-\text{H}_2\text{O}]^+$ , d)  $[\text{GEA}(9)_{\text{syn}}\text{N7Ag}-\text{H}_2\text{O}]^+$  and e)  $[\text{GEA}(9)_{\text{anti}}\text{N3Ag}-\text{H}_2\text{O}]^+$ . The vibrational frequencies were corrected with a factor of 0.983. The vertical bar indicates the diagnostic bands of the three most stable isomers of  $[\text{GEA}(9)\text{Ag}-\text{H}_2\text{O}]^+$ , which are absent in the IRMPD spectrum.

**Table SI 3.** Relative energies including zero point energy corrections (EE+ZPE) and relative standard Gibbs energies calculated at 298K ( $\Delta G^\circ$ ) for the isomers of  $[\text{GEA}(7)\text{Ag}-\text{H}_2\text{O}]^+$  complex and the correction of relative energies considering the effect of the solvent (PCM). Relative populations (R.P.) were calculated assuming a Boltzmann distribution at 298 K.

| Structure                                                                                                                                             | Gas phase  |                                |                     | PCM (water) |                                |                     |
|-------------------------------------------------------------------------------------------------------------------------------------------------------|------------|--------------------------------|---------------------|-------------|--------------------------------|---------------------|
|                                                                                                                                                       | EE+ZPE     | $\Delta G^\circ_{298\text{K}}$ | R.P.                | EE+ZPE      | $\Delta G^\circ_{298\text{K}}$ | R.P.                |
|                                                                                                                                                       | (kcal/mol) | (kcal/mol)                     |                     | (kcal/mol)  | (kcal/mol)                     |                     |
| 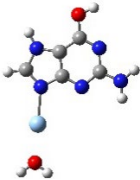<br>$[\text{GEA}(7)_{\text{anti}}\text{N9Ag}-\text{H}_2\text{O}]^+$  | 7.3        | 8.2                            | $1 \times 10^{-6}$  | 8.3         | 8.3                            | $8 \times 10^{-7}$  |
| <br>$[\text{GEA}(7)_{\text{anti}}\text{N3Ag}-\text{H}_2\text{O}]^+$ | 8.0        | 7.8                            | $2 \times 10^{-6}$  | 9.2         | 9.2                            | $2 \times 10^{-7}$  |
| <br>$[\text{GEA}(7)_{\text{syn}}\text{N3Ag}-\text{H}_2\text{O}]^+$ | 16.1       | 15.4                           | $5 \times 10^{-12}$ | 12.4        | 12.5                           | $7 \times 10^{-10}$ |
| <br>$[\text{GEA}(7)_{\text{syn}}\text{N9Ag}-\text{H}_2\text{O}]^+$ | 16.3       | 16.9                           | $4 \times 10^{-13}$ | 11.5        | 11.8                           | $2 \times 10^{-9}$  |
| <br>$[\text{GEA}(7)_{\text{syn}}\text{N1Ag}-\text{H}_2\text{O}]^+$ | 23.3       | 23.1                           | $1 \times 10^{-17}$ | 15.2        | 15.2                           | $7 \times 10^{-12}$ |

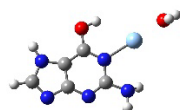

25.1      25.0       $5 \times 10^{-19}$       14.6      14.5       $2 \times 10^{-11}$

$[\text{GEA}(7)_{\text{anti}}\text{N1Ag}-\text{H}_2\text{O}]^+$

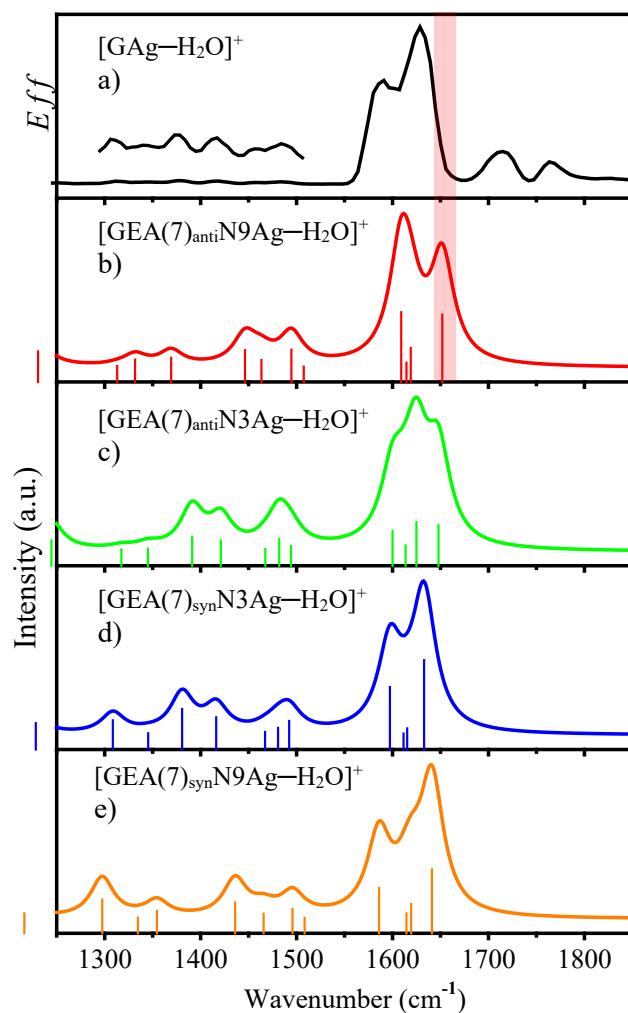

**Figure SI 3.** a) Experimental IRMPD spectrum of  $[\text{GAg}-\text{H}_2\text{O}]^+$  complex recorded in the spectral range  $1250\text{--}1850\text{ cm}^{-1}$  and calculated spectra of the four lowest energy isomers calculated at the B3LYP/6-311G++(d,p) and SDD level for  $\text{Ag}^+$ : b)  $[\text{GEA}(7)_{\text{anti}}\text{N9Ag}-\text{H}_2\text{O}]^+$ , c)  $[\text{GEA}(7)_{\text{anti}}\text{N3Ag}-\text{H}_2\text{O}]^+$ , d)  $[\text{GEA}(7)_{\text{syn}}\text{N3Ag}-\text{H}_2\text{O}]^+$  and e)  $[\text{GEA}(7)_{\text{syn}}\text{N9Ag}-\text{H}_2\text{O}]^+$ . The vibrational frequencies were corrected with a factor of 0.983. The vertical bar indicates the diagnostic band of the most stable isomer of  $[\text{GEA}(7)\text{Ag}-\text{H}_2\text{O}]^+$ , which is absent in the IRMPD spectrum.

**Table SI 4.** Relative energies including zero point energy corrections (EE+ZPE) and relative standard Gibbs energies calculated at 298K ( $\Delta G^\circ$ ) for the isomers of  $[\text{GKA}(3,7)\text{Ag}-\text{H}_2\text{O}]^+$  complex and the correction of relative energies considering the effect of the solvent (PCM). Relative populations (R.P.) were calculated assuming a Boltzmann distribution at 298 K.

| Structure                                                                                                                                         | Gas phase  |                                |                     | PCM (water) |                                |                    |
|---------------------------------------------------------------------------------------------------------------------------------------------------|------------|--------------------------------|---------------------|-------------|--------------------------------|--------------------|
|                                                                                                                                                   | EE+ZPE     | $\Delta G^\circ_{298\text{K}}$ | R.P.                | EE+ZPE      | $\Delta G^\circ_{298\text{K}}$ | R.P.               |
|                                                                                                                                                   | (kcal/mol) | (kcal/mol)                     |                     | (kcal/mol)  | (kcal/mol)                     |                    |
| <br>$[\text{GKA}(3,7)\text{O}/\text{N1Ag}-\text{H}_2\text{O}]^+$ | 8.8        | 7.0                            | $7 \times 10^{-6}$  | 8.8         | 7.4                            | $4 \times 10^{-6}$ |
| <br>$[\text{GKA}(3,7)\text{N1Ag}-\text{H}_2\text{O}]^+$         | 9.4        | 8.4                            | $7 \times 10^{-7}$  | 5.4         | 4.8                            | $3 \times 10^{-4}$ |
| <br>$[\text{GKA}(3,7)\text{N9Ag}-\text{H}_2\text{O}]^+$        | 24.2       | 23.7                           | $4 \times 10^{-18}$ | 6.8         | 6.1                            | $3 \times 10^{-5}$ |



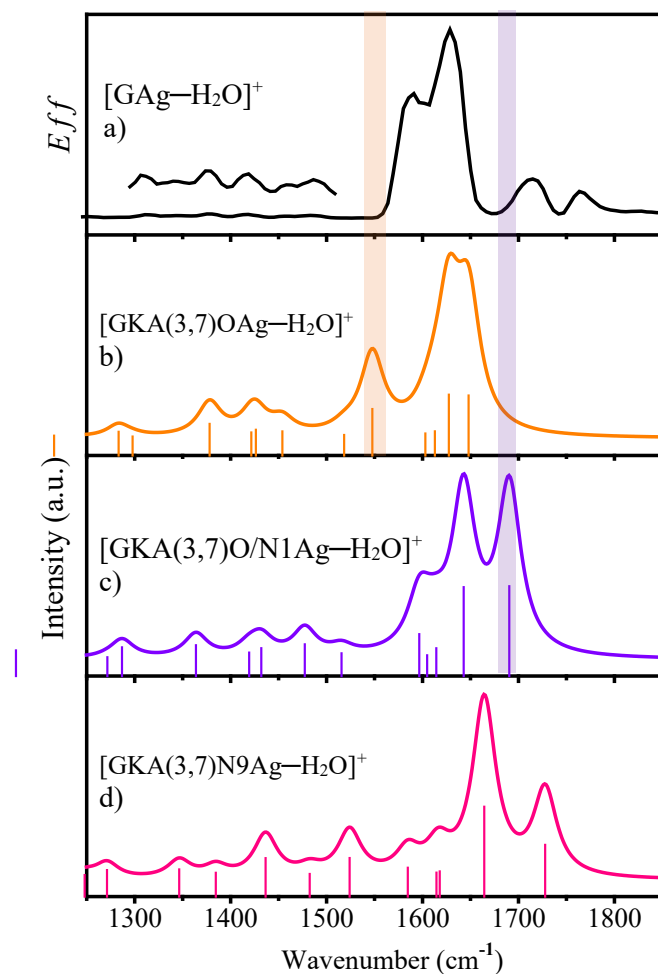

**Figure SI 4.** a) Experimental IRMPD spectrum of  $[\text{GAg-H}_2\text{O}]^+$  complex recorded in the spectral range 1250–1850  $\text{cm}^{-1}$  and calculated spectra of the four lowest energy isomers calculated at the B3LYP/6-311G++(d,p) and SDD level for  $\text{Ag}^+$ : b)  $[\text{GKA}(3,7)\text{OAg-H}_2\text{O}]^+$ , c)  $[\text{GKA}(3,7)\text{O/N1Ag-H}_2\text{O}]^+$  and d)  $[\text{GKA}(3,7)\text{N9Ag-H}_2\text{O}]^+$ . The vibrational frequencies were corrected with a factor of 0.983. The vertical bars indicate the diagnostic bands of the two most stable isomers of  $[\text{GKA}(3,7)\text{Ag-H}_2\text{O}]^+$ , which are absent in the IRMPD spectrum.

**Table SI 5.** Relative energies including zero point energy corrections (EE+ZPE) and relative standard Gibbs energies calculated at 298K ( $\Delta G^\circ$ ) for the isomers of  $[\text{GKA}(7,9)\text{Ag}-\text{H}_2\text{O}]^+$  complex and the correction of relative energies considering the effect of the solvent (PCM). Relative populations (R.P.) were calculated assuming a Boltzmann distribution at 298 K.

| Structure                                                                                                                                  | Gas phase  |                                |                     | PCM (water) |                                |                     |
|--------------------------------------------------------------------------------------------------------------------------------------------|------------|--------------------------------|---------------------|-------------|--------------------------------|---------------------|
|                                                                                                                                            | EE+ZPE     | $\Delta G^\circ_{298\text{K}}$ | R.P.                | EE+ZPE      | $\Delta G^\circ_{298\text{K}}$ | R.P.                |
|                                                                                                                                            | (kcal/mol) | (kcal/mol)                     |                     | (kcal/mol)  | (kcal/mol)                     |                     |
| 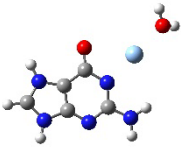<br>$[\text{GKA}(7,9)\text{N1Ag}-\text{H}_2\text{O}]^+$   | 11.4       | 10.7                           | $1 \times 10^{-8}$  | 8.5         | 8.2                            | $1 \times 10^{-6}$  |
| <br>$[\text{GKA}(7,9)\text{OAg}-\text{H}_2\text{O}]^+$   | 13.4       | 12.1                           | $1 \times 10^{-9}$  | 12.9        | 12.7                           | $5 \times 10^{-10}$ |
| <br>$[\text{GKA}(7,9)\text{N3Ag}-\text{H}_2\text{O}]^+$ | 33.0       | 32.8                           | $9 \times 10^{-25}$ | 13.0        | 12.5                           | $7 \times 10^{-10}$ |

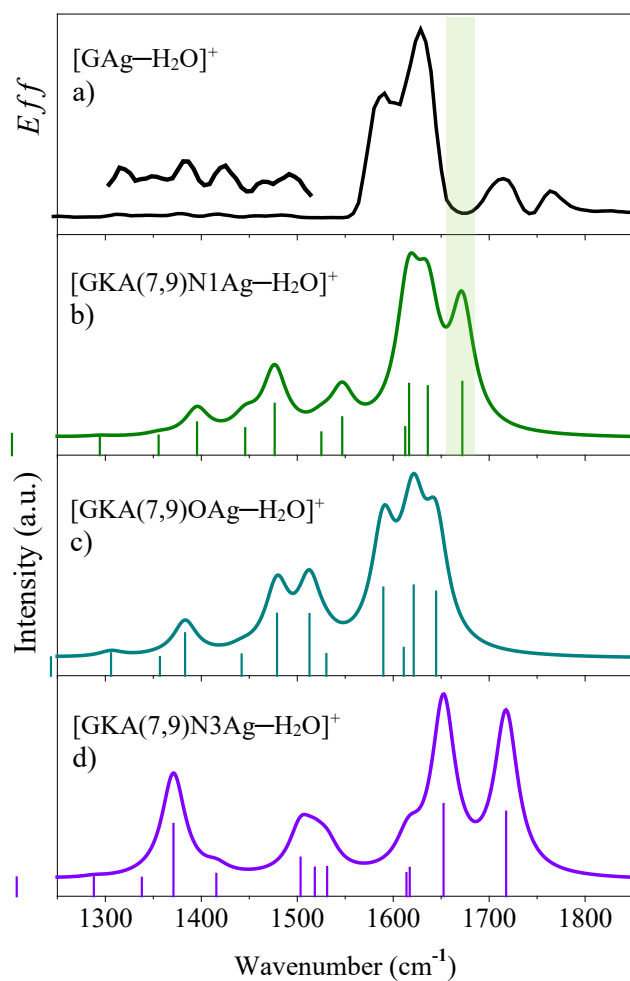

**Figure SI 5.** a) Experimental IRMPD spectrum of  $[\text{GAg-H}_2\text{O}]^+$  complex recorded in the spectral range  $1250\text{--}1850\text{ cm}^{-1}$  and calculated spectra of the four lowest energy isomers calculated at the B3LYP/6-311G++(d,p) and SDD level for  $\text{Ag}^+$ : b)  $[\text{GKA}(7,9)\text{N1Ag-H}_2\text{O}]^+$ , c)  $[\text{GKA}(7,9)\text{OAg-H}_2\text{O}]^+$  and d)  $[\text{GKA}(7,9)\text{N3Ag-H}_2\text{O}]^+$ . The vibrational frequencies were corrected with a factor of 0.983. The vertical bar indicates the diagnostic band of the most stable isomer of  $[\text{GKA}(7,9)\text{Ag-H}_2\text{O}]^+$ , which is absent in the IRMPD spectrum.

**Table SI 6.** Relative energies including zero point energy corrections (EE+ZPE) and relative standard Gibbs energies calculated at 298K ( $\Delta G^\circ$ ) for the isomers of  $[\text{GKA}(3,9)\text{Ag}-\text{H}_2\text{O}]^+$  complex and the correction of relative energies considering the effect of the solvent (PCM). Relative populations (R.P.) were calculated assuming a Boltzmann distribution at 298 K.

| Structure                                                                                                                                  | Gas phase  |                                |                     | PCM (water) |                                |                    |
|--------------------------------------------------------------------------------------------------------------------------------------------|------------|--------------------------------|---------------------|-------------|--------------------------------|--------------------|
|                                                                                                                                            | EE+ZPE     | $\Delta G^\circ_{298\text{K}}$ | R.P.                | EE+ZPE      | $\Delta G^\circ_{298\text{K}}$ | R.P.               |
|                                                                                                                                            | (kcal/mol) | (kcal/mol)                     |                     | (kcal/mol)  | (kcal/mol)                     |                    |
| 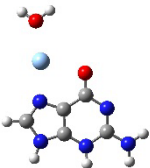<br>$[\text{GKA}(3,9)\text{N7/OAg}-\text{H}_2\text{O}]^+$ | 15.6       | 14.8                           | $2 \times 10^{-11}$ | 9.3         | 8.6                            | $5 \times 10^{-7}$ |
| <br>$[\text{GKA}(3,9)\text{N1Ag}-\text{H}_2\text{O}]^+$  | 20.3       | 19.1                           | $1 \times 10^{-14}$ | 9.3         | 8.8                            | $4 \times 10^{-7}$ |

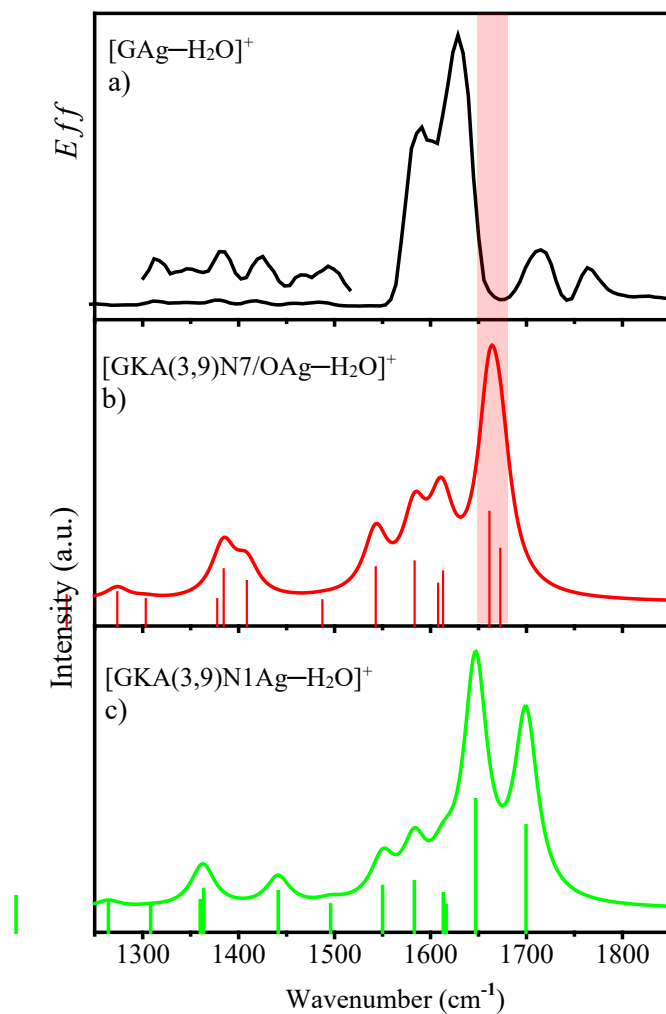

**Figure SI 6.** a) Experimental IRMPD spectrum of  $[\text{GAg-H}_2\text{O}]^+$  complex recorded in the spectral range  $1250\text{--}1850\text{ cm}^{-1}$  and calculated spectra of the four lowest energy isomers calculated at the B3LYP/6-311G++(d,p) and SDD level for  $\text{Ag}^+$ : b)  $[\text{GKA}(3,9)\text{N7/OAg-H}_2\text{O}]^+$  and c)  $[\text{GKA}(3,9)\text{N1Ag-H}_2\text{O}]^+$ . The vibrational frequencies were corrected with a factor of 0.983. The vertical bar indicates the diagnostic band of the most stable isomer of  $[\text{GKA}(3,9)\text{Ag-H}_2\text{O}]^+$ , which is absent in the IRMPD spectrum.

**Table SI 7.** Relative standard Gibbs energies calculated at 298K ( $\Delta G^\circ$ ) for the monohydrated isomers of  $[\text{GKA}(1,9)\text{N7Ag}]^+$ . Relative populations (R.P.) were calculated assuming a Boltzmann distribution at 298 K.

| Structure                                                                                                                                    | Gas phase                      |                       |
|----------------------------------------------------------------------------------------------------------------------------------------------|--------------------------------|-----------------------|
|                                                                                                                                              | $\Delta G^\circ_{298\text{K}}$ | R.P.                  |
|                                                                                                                                              | (kcal/mol)                     | 298 K                 |
| 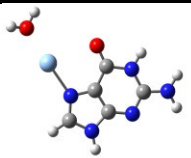<br>$[\text{GKA}(1,9)\text{N7Ag}-\text{H}_2\text{O}]^+$     | 0                              | 1                     |
| <br>$[\text{GKA}(1,9)\text{N7Ag}-\text{H}_2\text{O}]^+-1$  | 8.6                            | $5 \times 10^{-7}$    |
| <br>$[\text{GKA}(1,9)\text{N7Ag}-\text{H}_2\text{O}]^+-2$ | 9.7                            | $7.8 \times 10^{-8}$  |
| <br>$[\text{GKA}(1,9)\text{N7Ag}-\text{H}_2\text{O}]^+-3$ | 10.1                           | $4 \times 10^{-8}$    |
| <br>$[\text{GKA}(1,9)\text{N7Ag}-\text{H}_2\text{O}]^+-4$ | 12.3                           | $9.6 \times 10^{-10}$ |

**Table SI 8.** Relative standard Gibbs energies calculated at 298K ( $\Delta G^\circ$ ) for the monohydrated isomers of  $[\text{GKA}(1,7)\text{N9Ag}]^+$ . Relative populations (R.P.) were calculated assuming a Boltzmann distribution at 298 K.

| Structure                                                                                                                                    | Gas phase                      |                       |
|----------------------------------------------------------------------------------------------------------------------------------------------|--------------------------------|-----------------------|
|                                                                                                                                              | $\Delta G^\circ_{298\text{K}}$ | R.P.                  |
|                                                                                                                                              | (kcal/mol)                     | 298 K                 |
| 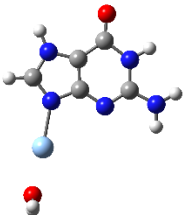<br>$[\text{GKA}(1,7)\text{N9Ag}-\text{H}_2\text{O}]^+$     | 0                              | 1                     |
| <br>$[\text{GKA}(1,7)\text{N9Ag}-\text{H}_2\text{O}]^+-1$  | 9                              | $2.5 \times 10^{-7}$  |
| <br>$[\text{GKA}(1,7)\text{N9Ag}-\text{H}_2\text{O}]^+-2$ | 11.7                           | $2.7 \times 10^{-9}$  |
| <br>$[\text{GKA}(1,7)\text{N9Ag}-\text{H}_2\text{O}]^+-3$ | 14.3                           | $3.3 \times 10^{-11}$ |

**Table SI 9.** Relative energies including zero point energy corrections (EE+ZPE) and relative standard Gibbs energies calculated at 298K ( $\Delta G^\circ$ ) for the isomers of [GAgG]<sup>+</sup> complex and the correction of relative energies considering the effect of the solvent (PCM). Relative populations (R.P.) were calculated assuming a Boltzmann distribution at 298 K.

| Structure                                                                           | Gas phase  |                         |                    | PCM (water) |                         |                    |
|-------------------------------------------------------------------------------------|------------|-------------------------|--------------------|-------------|-------------------------|--------------------|
|                                                                                     | EE+ZPE     | $\Delta G^\circ_{298K}$ | R.P.               | EE+ZPE      | $\Delta G^\circ_{298K}$ | R.P.               |
|                                                                                     | (kcal/mol) | (kcal/mol)              |                    | (kcal/mol)  | (kcal/mol)              |                    |
| 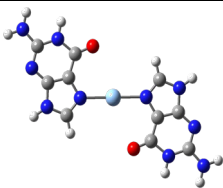   | 0          | 0                       | 1                  | 0           | 0                       | 1                  |
| [GKA(1,9)N7-Ag-N7GKA(1,9)] <sup>+</sup>                                             |            |                         |                    |             |                         |                    |
|   | 2.2        | 2.7                     | 1x10 <sup>-2</sup> | 0.5         | 2.2                     | 2x10 <sup>-2</sup> |
| [GKA(1,9)N7-Ag-N3GKA(1,7)] <sup>+</sup>                                             |            |                         |                    |             |                         |                    |
|  | 2.9        | 2.8                     | 9x10 <sup>-3</sup> | 0.5         | 1.2                     | 0.1                |
| [GKA(1,9)N7-Ag-N9GKA(1,7)] <sup>+</sup>                                             |            |                         |                    |             |                         |                    |
|  | 5.2        | 5.0                     | 2x10 <sup>-4</sup> | 7.7         | 8.2                     | 1x10 <sup>-6</sup> |
| [GEA(9) <i>anti</i> N7-Ag-N7GKA(1,9)] <sup>+</sup>                                  |            |                         |                    |             |                         |                    |
|  | 6.3        | 5.8                     | 6x10 <sup>-5</sup> | 1.2         | 2.4                     | 2x10 <sup>-2</sup> |
| [GKA(1,7)N9-Ag-N9GKA(1,7)] <sup>+</sup>                                             |            |                         |                    |             |                         |                    |



|                                                                                     |      |      |                     |      |      |                     |
|-------------------------------------------------------------------------------------|------|------|---------------------|------|------|---------------------|
| 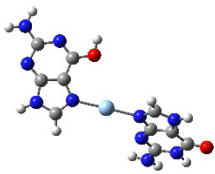   | 8.7  | 8.3  | $8 \times 10^{-7}$  | 8.1  | 8.8  | $4 \times 10^{-7}$  |
| [GEA(9) <i>anti</i> N7-Ag-N9GKA(1,7)] <sup>+</sup>                                  |      |      |                     |      |      |                     |
|    | 11.2 | 10.4 | $2 \times 10^{-8}$  | 6.3  | 6.4  | $2 \times 10^{-5}$  |
| [GEA(9) <i>anti</i> N7-Ag-N7GKA(9) <i>anti</i> ] <sup>+</sup>                       |      |      |                     |      |      |                     |
|    | 11.8 | 11.8 | $2 \times 10^{-9}$  | 9.9  | 10.9 | $1 \times 10^{-8}$  |
| [GEA(9) <i>anti</i> N7-Ag-N3GKA(1,7)] <sup>+</sup>                                  |      |      |                     |      |      |                     |
|  | 20.7 | 22.9 | $2 \times 10^{-17}$ | 16.7 | 17.9 | $8 \times 10^{-14}$ |
| [GEA(9) <i>anti</i> N7-Ag-N3GKA(9) <i>anti</i> ] <sup>+</sup>                       |      |      |                     |      |      |                     |
|  | 23.8 | 26.2 | $6 \times 10^{-20}$ | 10.8 | 12.2 | $1 \times 10^{-9}$  |
| [GEA(9) <i>anti</i> N7-Ag-N3GKA(1, 9)] <sup>+</sup>                                 |      |      |                     |      |      |                     |

---
